# Supplementary material for: Examining the Influence of the Human Gut Microbiota on Cognition and Stress: A Systematic Review of the Literature
Source: MDPI journal article supplement (doi:10.3390/nu14214623), 2022-11-02
Supplement: s1 [file s1]

**Supplementary Table S1.** List of excluded items from abstract (2<sup>nd</sup> pass) and full text (3<sup>rd</sup> pass) screen process describing point of exclusion and reason

| Author                                                 | Year | Experiment<br>/ Review | Type<br>Human (H),<br>animal. (A), n/a,<br>or unknown (?) | Excluded Y/N<br>(Level of exclusion and reason) |
|--------------------------------------------------------|------|------------------------|-----------------------------------------------------------|-------------------------------------------------|
| <b>Sept 2020 Search</b>                                |      |                        |                                                           |                                                 |
| <i><u>Abstract (2<sup>nd</sup> pass) synthesis</u></i> |      |                        |                                                           |                                                 |
| Aatsinki, S.-K. et al                                  | 2020 | E                      | H                                                         | Y – Abstract – Not relevant                     |
| Ahmadi, S. et al.                                      | 2020 | E                      | H                                                         | Y – Abstract – Older adults                     |
| Allen, J.M. et al                                      | 2019 | E                      | A                                                         | Y – Abstract – Animal                           |
| Amirani, E. et al                                      | 2020 | R                      |                                                           | Y – Abstract – Review                           |
| Antoni, C. et al                                       | 2019 | R                      | H                                                         | Y – Abstract – Review                           |
| Axling, U. et al                                       | 2020 | E                      | H                                                         | Y – Abstract – Duplicate                        |
| Axling, U. et al                                       | 2020 | E                      | H                                                         | Y – Abstract – Duplicate                        |
| Bagheri, S. et al                                      | 2019 | R                      | H                                                         | Y – Abstract – Review                           |
| Bajaj, J.S. et al                                      | 2020 | E                      | H                                                         | Y – Abstract – Cirrhosis                        |
| Baptista, L.C. et al                                   | 2020 | E                      | H                                                         | Y – Abstract – Older adults                     |
| Baptista, L.C. et al                                   | 2020 | R                      | H                                                         | Y – Abstract – Review                           |
| Broers, V. et al                                       | 2019 | R                      | H                                                         | Y – Abstract – Review                           |
| Chaiyasut, C. & Sivamaruthi, B. S.                     | 2018 | E                      | ?                                                         | Y – Abstract – Not relevant                     |
| Cook, J. et al                                         | 2020 | E                      | ?                                                         | Y – Abstract – Clinical                         |
| Crowson, M.M. & McClave, S.A.                          | 2020 | R                      |                                                           | Y – Abstract – Review                           |
| Cruz-Pereira, J.S. et al                               | 2020 | R                      |                                                           | Y – Abstract – Review                           |
| Cryan, J.F. & Dinan, T.G.                              | 2019 | R                      |                                                           | Y – Abstract – Review                           |
| Czajeczeny, D. et al                                   | 2020 | ?                      | ?                                                         | Y – Abstract – Non-English                      |
| Dalile, B., et al                                      | 2019 | R                      |                                                           | Y – Abstract – Letter                           |
| Deleemans, J.M. et al                                  | 2019 | E                      | H                                                         | Y – Abstract – Study protocol                   |
| Enck, P. H. et al                                      | 2019 | Letter                 | ?                                                         | Y – Abstract – Not relevant                     |
| Francis, A.P. & Dominguez-Bello, M.G.                  | 2019 | R                      |                                                           | Y – Abstract – Review                           |
| Gao, W. et at                                          | 2020 | E                      | H                                                         | Y – Abstract – Not relevant                     |
| Gaskell, S.K. et al                                    | 2020 | E                      | H                                                         | Y – Abstract – Physical                         |
| Geng, S. et al                                         | 2020 | E                      | A                                                         | Y – Abstract – Animal                           |
| Ghavami, A. et al                                      | 2019 | E                      | H                                                         | Y – Abstract – Not appropriate                  |
| Gubert, C. et al                                       | 2020 | R                      | H & A                                                     | Y – Abstract – Review                           |
| Hakimian, J.K. et al                                   | 2019 | E                      | A                                                         | Y – Abstract – Animal                           |
| Hashimoto, K. et al                                    | 2019 | E                      | A                                                         | Y – Abstract – Animal                           |
| He, X.-Y. et al                                        | 2020 | R                      | ?                                                         | Y – Abstract – Review                           |
| Hiel, S. et al                                         | 2019 | E                      | H                                                         | Y – Abstract – Diet                             |
| Hoffman, K.W. e al                                     | 2020 | R                      | H                                                         | Y – Abstract – Schizophrenia                    |
| Huang, W.-C. et al                                     | 2020 | E                      | H                                                         | Y – Abstract – Duplicate                        |
| Huang, W.-C. et al                                     | 2020 | E                      | H                                                         | Y – Abstract – Physical                         |
| Huang, W.-C. et al                                     | 2019 | E                      | H                                                         | Y – Abstract – Physical                         |
| Huang, W.-C. et al (b)                                 | 2020 | E                      | H                                                         | Y – Abstract – Physical                         |
| Huang, W.-C., et al                                    | 2019 | E                      | H                                                         | Y – Abstract – Duplicate                        |
| Huang, W.-C., et al                                    | 2019 | E                      | H                                                         | Y – Abstract – Physical                         |
| Hwang, Y.-H. et al                                     | 2019 | E                      | H                                                         | Y – Abstract – Duplicate                        |
| Ishikawa, R. et al                                     | 2019 | E                      | A                                                         | Y – Abstract – Animal                           |

| Author                      | Year | Experiment<br>/ Review | Type<br>Human (H),<br>animal. (A), n/a,<br>or unknown (?) | Excluded Y/N<br>(Level of exclusion and reason) |
|-----------------------------|------|------------------------|-----------------------------------------------------------|-------------------------------------------------|
| Iva, L., et al              | 2019 | E                      | A                                                         | Y – Abstract – Animal                           |
| Jamilian, M. E. et al       | 2019 | E                      | H                                                         | Y – Abstract – Not relevant                     |
| Jang, H.M. et al            | 2018 | E                      | A                                                         | Y – Abstract – Animal                           |
| Ji, S. et al                | 2019 | E                      | A                                                         | Y – Abstract – Animal                           |
| Jia, M, et al               | 2019 | ?                      | ?                                                         | Y – Abstract – Non-English                      |
| Kobayashi, Y, et al         | 2019 | E                      | H                                                         | Y – Abstract – Older adults                     |
| Komanduri, M, et al         | 2019 | R                      | H                                                         | Y – Abstract – Review                           |
| Komaroff, A. L.             | 2019 | R                      | H                                                         | Y – Abstract – Review                           |
| Kreider, R.B. et al         | 2019 | E                      | H                                                         | Y – Abstract – Physical                         |
| Lavazza, A. & Sironi, V.A.  | 2019 | R                      |                                                           | Y – Abstract – Review                           |
| Lee, M.-C. et al            | 2049 | E                      | H                                                         | Y – Abstract – Physical                         |
| Leigh, S.-J. & Morris, M.J. | 2020 | R                      |                                                           | Y – Abstract – Review                           |
| Lin, C.-L. et al            | 2020 | E                      | H                                                         | Y – Abstract – Physical                         |
| Lin, C-L., et al            | 2020 | E                      | H                                                         | Y – Abstract – Physical                         |
| Loughman, A. et al          | 2020 | E                      | H                                                         | Y – Abstract – Infants                          |
| Loughman, A. et al          | 2020 | Letter                 |                                                           | Y – Abstract – Letter                           |
| Luisi, M.L.E. et al         | 2019 | E                      | H                                                         | Y – Abstract – Diet                             |
| Lyte, J.M. et al            | 2020 | E                      | A                                                         | Y – Abstract – Animal                           |
| Mackner, L.M. et al         | 2020 | E                      | H                                                         | Y – Abstract – Paediatric                       |
| Mahmood A. et al            | 2018 | E                      | other                                                     | Y – Abstract – Not relevant                     |
| Mathee, K. et al            | 2020 | R                      | H                                                         | Y – Abstract – Review                           |
| Mazani, M. et al            | 2018 | E                      | H                                                         | Y – Abstract – Physical                         |
| Michal, N. et al            | 2019 | R                      | H                                                         | Y – Abstract – Review                           |
| Nagasaki, Y. et al          | 2020 | E                      | H                                                         | Y – Abstract – Non-English                      |
| Naik, R.                    | 2019 | R                      | H                                                         | Y – Abstract – Review                           |
| Novotný, M., B. et al       | 2019 | R                      | H                                                         | Y – Abstract – Review                           |
| Pasquaretta, C. et al       | 2018 | R                      | H                                                         | Y – Abstract – Duplicate                        |
| Pasquaretta, C. et al       | 2018 | R                      | H                                                         | Y – Abstract – Review                           |
| Qu, W. et al                | 2019 | E                      | H                                                         | Y – Abstract – Not relevant                     |
| Rahimlou, M., et al.        | 2020 | R                      | H                                                         | Y – Abstract – Review                           |
| Ranuh, R. et al             | 2019 | E                      | A                                                         | Y – Abstract – Animal                           |
| Reininghaus, E. Z. et al    | 2020 | E                      | H                                                         | Y – Abstract – Clinical                         |
| Rice, M.W. et al            | 2019 | R                      | ?                                                         | Y – Abstract – Duplicate                        |
| Rice, M.W. et al            | 2019 | R                      | ?                                                         | Y – Abstract – Review                           |
| Rivera-Iñiguez, I., et al.  | 2019 | R                      | ?                                                         | Y – Abstract – Review                           |
| Román, E. et al             | 2019 | E                      | H                                                         | Y – Abstract – Cirrhosis                        |
| Ross, S. M.                 | 2019 | R                      | H                                                         | Y – Abstract – Review                           |
| Saccenti, E. et al          | 2019 | E                      | H                                                         | Y – Abstract – Reproduced                       |
| Saji, N.                    | 2020 | E                      | H                                                         | Y – Abstract – Dementia                         |
| Salami, M. et al            | 2019 | E                      | H                                                         | Y – Abstract – Clinical                         |
| Slykerman R. F. et al       | 2018 | E                      | H                                                         | Y – Abstract – Paediatric                       |
| Slykermann, R.F. et al      | 2018 | E                      | H                                                         | Y – Abstract – Paediatric                       |
| Sun, Y. et al               | 2020 | R                      | ?                                                         | Y – Abstract – Review                           |
| Sunada, Y. et al            | 2019 | E                      | H                                                         | Y – Abstract – Not relevant                     |
| Szopinska-Tokov, J., et al. | 2020 | E                      | H                                                         | Y – Abstract – Clinical                         |
| Tabrizi R. et al,           | 2019 | R                      | H                                                         | Y – Abstract – Review                           |
| Valenina, I.                | 2019 | R                      | H                                                         | Y – Abstract – Review                           |
| Venkataraman, R. et al      | 2020 | E                      | H                                                         | Y – Abstract – Duplicate                        |

| Author                       | Year | Experiment<br>/ Review | Type<br>Human (H),<br>animal. (A), n/a,<br>or unknown (?) | Excluded Y/N<br>(Level of exclusion and reason) |
|------------------------------|------|------------------------|-----------------------------------------------------------|-------------------------------------------------|
| Verdi, S. et al              | 2018 | E                      | H                                                         | Y – Abstract – Duplicate                        |
| Vogel, S.C. et al            | 2020 | R                      |                                                           | Y – Abstract – Review                           |
| Vogel, S.C. et al            | 2020 | R                      | H                                                         | Y – Abstract – Review                           |
| Wang Y. et al                | 2019 | E                      | ?                                                         | Y – Abstract – Not relevant                     |
| Wang, L.-K. et al            | 2018 | E                      | H                                                         | Y – Abstract – Abstract only                    |
| Wang, J. Y. et al            | 2020 | R                      | H                                                         | Y – Abstract – Review                           |
| Westfall, S. & Pasinetti, G. | 2019 | E                      | A                                                         | Y – Abstract – Animal                           |
| Wu, Q. et al                 | 2020 | E                      | A                                                         | Y – Abstract – Animal                           |
| Xing, Z. et al               | 2019 | E                      | A                                                         | Y – Abstract – Animal                           |
| Xu, C. et al                 | 2020 | E                      | A                                                         | Y – Abstract – Animal                           |
| Yang, X. D. et al            | 2019 | E                      | H                                                         | Y – Abstract – Not relevant                     |
| Zeng, C. et al               | 2020 | R                      | H                                                         | Y – Abstract – Review                           |
| Zhang, K., Fujita, Y., et al | 2019 | E                      | A                                                         | Y – Abstract – Animal                           |
| Zhang, X. et al              | 2019 | E                      | A                                                         | Y – Abstract – Animal                           |

#### Full-text (3<sup>rd</sup> pass) synthesis

|                            |      |   |   |                                  |
|----------------------------|------|---|---|----------------------------------|
| Axling, U. et al           | 2020 | E | H | Y - Full text – Not relevant     |
| Bagga D. et al             | 2018 | E | H | Y - Full text – Date range error |
| Castellazzi, A., et al     | 2018 | E | H | Y - Full text – Could not locate |
| Gonzalez-Mercado, V. et al | 2020 | E | H | Y - Full text – Med. Condition   |
| Hantsoo, L. et al          | 2019 | E | H | Y - Full text – Not relevant     |
| Hechler, C. et al          | 2019 | E | H | Y - Full text – Not relevant     |
| Hwang, Y -H. et al         | 2019 | E | H | Y - Full text – Med. Condition   |
| Kazemi, A. et al           | 2019 | E | H | Y - Full text – Med. Condition   |
| Lalitsuradej, E. et al     | 2019 | E | H | Y - Full text – Not relevant     |
| Lew, L.-C. et al           | 2019 | E | H | Y - Full text – Date range error |
| Lukyachenko, O. et al      | 2019 | E | H | Y - Full text – Not relevant     |
| Rudzki, L. et al           | 2019 | E | H | Y - Full text – Med. Condition   |
| Rusling, M. et al          | 2019 | E | H | Y - Full text – No peer review   |
| Saji, N. et al             | 2019 | E | H | Y - Full text – Older adults     |
| Smith, A. (b)              | 2019 | E | H | Y - Full text – Not relevant     |
| Szopinska-Tokov, J. et al  | 2020 | E | H | Y - Full text – Younger sample   |
| Verdi, S. et al            | 2018 | E | H | Y - Full text – Older adults     |

#### **Aug 2021 Search**

##### Abstract (2<sup>nd</sup> pass) synthesis

|                               |      |    |   |                                |
|-------------------------------|------|----|---|--------------------------------|
| Angoa- Perez, M. et al        | 2020 | E  | H | Y – Abstract – Med. Condition  |
| Arnoriaga-Rodriguez, M. et al | 2021 | RL | H | Y – Abstract – Research letter |
| Bear, T. et al                | 2021 | R  | H | Y – Abstract – Review          |
| Berding, K. et al             | 2021 | E  | H | Y – Abstract – Duplicate       |
| Brenner, L. A. et al          | 2020 | E  | H | Y – Abstract – Clinical        |
| Dzyuba, A. & Dzyuba, V.       | 2021 | R  | H | Y – Abstract – Review          |
| Kim, M. et al                 | 2021 | E  | H | Y – Abstract – Not relevant    |
| Lundtorp-Olsen, C. et al      | 2021 | E  | H | Y – Abstract – Not relevant    |
| Okubo, R. et al               | 2021 | R  | H | Y – Abstract – Review          |
| Purdy, M                      | 2021 | R  | H | Y – Abstract – Not available   |
| Schreiber, C. et al           | 2021 | E  | H | Y – Abstract – Not appropriate |

| Author                                           | Year | Experiment<br>/ Review | Type<br>Human (H),<br>animal. (A), n/a,<br>or unknown (?) | Excluded Y/N<br>(Level of exclusion and reason) |
|--------------------------------------------------|------|------------------------|-----------------------------------------------------------|-------------------------------------------------|
| Taylor, A. et al                                 | 2020 | E                      | H                                                         | Y – Abstract - Duplicate                        |
| Wang, Z. et al                                   | 2021 | E                      | H & A                                                     | Y – Abstract – Not appropriate                  |
| Zhu, B. et al                                    | 2020 | E                      | H                                                         | Y – Abstract – Med. conditon                    |
| <i>Full-text (3<sup>rd</sup> pass) synthesis</i> |      |                        |                                                           |                                                 |
| Berding, K. et al                                | 2020 | E                      | H                                                         | Y – Full text – Paediatric                      |
| Bernier, F. et al                                | 2021 | E                      | H                                                         | Y – Full text – Paediatric                      |
| Brunt, V. E. et al                               | 2021 | E                      | H                                                         | Y – Full text – Clinical                        |
| Codner, P. et al                                 | 2021 | R                      | H                                                         | Y – Full text – Review                          |
| Dong, W. et al                                   | 2021 | E                      | H                                                         | Y – Full text – Paediatric                      |
| Han, M. et al                                    | 2020 | E                      | H                                                         | Y – Full text – Not relevant                    |
| Igwe, E. O, et al                                | 2020 | E                      | H                                                         | Y – Full text – Elderly                         |
| Khine, W. W. et al                               | 2020 | E                      | H                                                         | Y – Full text – Elderly                         |
| Kim, C.-S. et al                                 | 2020 | E                      | H                                                         | Y – Full text – Elderly                         |
| Ling, Y., Gong, T. et al                         | 2020 | E                      | H                                                         | Y – Full text – Clinical                        |
| Ling, Y., Gu, Q. et al                           | 2020 | E                      | H                                                         | Y – Full text – Ref not found                   |
| Liu, P. J. et al                                 | 2021 | E                      | H                                                         | Y – Full text – Clinical                        |
| Ruiz-Saavedra, S. et al                          | 2020 | E                      | H                                                         | Y – Full text – Elderly                         |
| Sanborn, V. et a;                                | 2020 | E                      | H                                                         | Y – Full text – Elderly                         |
| van Soest, A. P. et al                           | 2020 | E                      | H                                                         | Y – Full text – Clinical                        |
| Vanhatalo, A. et al                              | 2020 | E                      | H                                                         | Y – Full text – Clinical                        |
| Xiao, J. et al                                   | 2020 | E                      | H                                                         | Y – Full text – Clinical                        |
| Zhang, X. et al                                  | 2021 | E                      | H                                                         | Y – Full text – Clinical                        |
| Zhang, Y. et al                                  | 2021 | E                      | H                                                         | Y – Full text – Clinical                        |

List of abbreviations: Experiment (E); Review (R); Human (H), Animal. (A), Research Letter (RL), not applicable (n/a); unknown (?); yes (Y); systematic literature review (SLR)
